# Supplementary material for: Butyrate Alters Pyruvate Flux and Induces Lipid Accumulation in Cultured Colonocytes
Source: MDPI journal article supplement (doi:10.3390/ijms222010937), 2021-10-10
Supplement: s1 [file s1]

## Supplementary figures

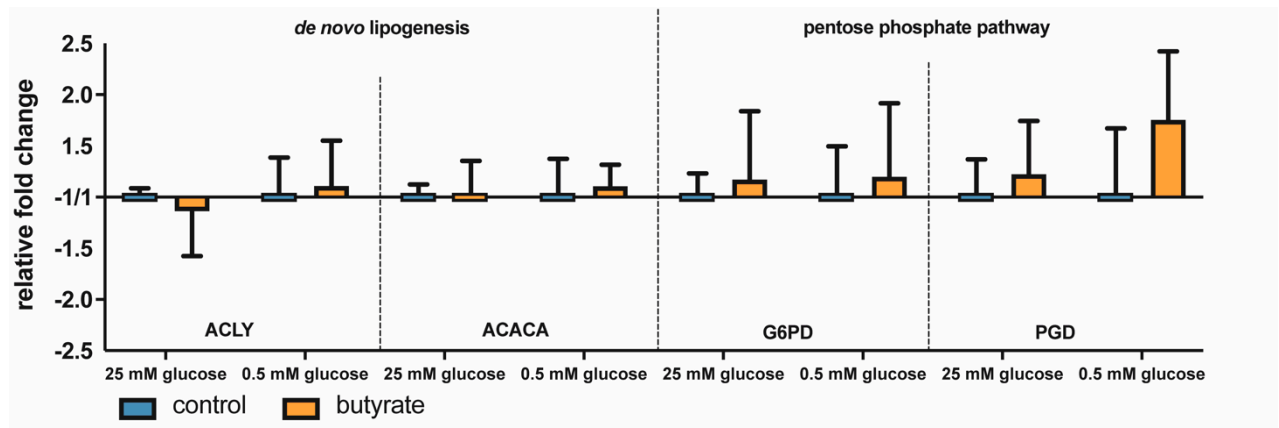

**Supplementary Figure S1. Relative gene expression of *de novo* lipogenesis and pentose phosphate pathway genes in long-term butyrate exposed high and low glucose HT29 cells.** Relative gene expression of ATP citrate lyase (ACLY), acetyl-Coenzyme A carboxylase alpha (ACACA) glucose-6-phosphate dehydrogenase (G6PD) and 6-phosphogluconate Dehydrogenase (PGD) in 25 mM and 0.5 mM glucose cultured HT29 cells exposed to only medium or 1 mM butyrate for 72 hours. (Data are derived from N=3-4 independent experiments and are presented as mean  $\pm$  SD; significance was determined using two-way ANOVA followed by Bonferroni's post-hoc analysis).

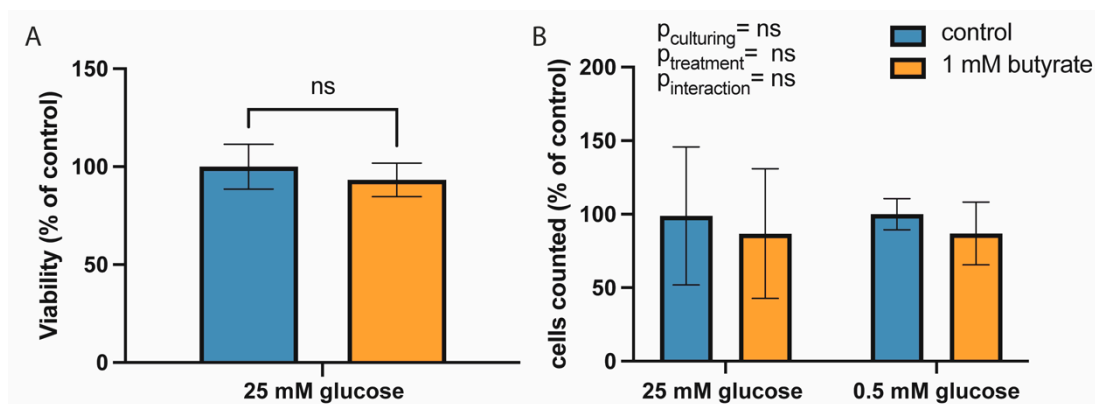

**Supplementary Figure S2. Viability and cell count after 48 hours exposure to 1 mM butyrate.** A. Viability of high glucose (25 mM) cultured HT29 cells after 48 hours exposure to 1 mM butyrate (N=2) B. Cell-count of high (25 mM) and low glucose (0.5 mM) cultured HT29 cells after 48 hours exposure to 1 mM butyrate (N=3; data are presented as mean  $\pm$  SD; significance was determined using Student's t-test (A) or two-way ANOVA followed by Bonferroni's post-hoc analysis (B)).
